# Supplementary material for: Data-driven analysis using multiple self-report questionnaires to identify college students at high risk of depressive disorder
Source: Springer Nature journal article supplement (doi:10.1038/s41598-020-64709-7), 2020-05-12
Supplement: 41598_2020_64709_MOESM1_ESM.pdf [file 41598_2020_64709_MOESM1_ESM.pdf]

# Data-driven analysis using multiple self-report questionnaires to identify college students at high risk of depressive disorder

**Bongjae Choi<sup>1</sup>, Geumsook Shim<sup>2</sup>, Bumseok Jeong<sup>2, 3, \*</sup>, and Sungho Jo<sup>1, \*</sup>**

<sup>1</sup>School of Computing, Korea Advanced Institute of Science and Technology (KAIST), Daejeon, South Korea

<sup>2</sup>KAIST clinic Pappalardo center, Korea Advanced Institute of Science and Technology (KAIST), Daejeon, South Korea

<sup>3</sup>Graduate School of Medical Science and Engineering, Korea Advanced Institute of Science and Technology (KAIST), Daejeon, South Korea

\*Corresponding authors: B. J. (bs.jeong@kaist.ac.kr) and S. J. (shjo@kaist.ac.kr)

## ABSTRACT

Depression diagnosis is one of the most important issues in psychiatry. Depression is a complicated mental illness that varies in symptoms and requires patient cooperation. In the present study, we demonstrated a novel data-driven attempt to diagnose depressive disorder based on clinical questionnaires. It includes deep learning, multi-modal representation, and interpretability to overcome the limitations of the data-driven approach in clinical application. We implemented a shared representation model between three different questionnaire forms to represent questionnaire responses in the same latent space. Based on this, we proposed two data-driven diagnostic methods; unsupervised and semi-supervised. We compared them with a cut-off screening method, which is a traditional diagnostic method for depression. The unsupervised method considered more items, relative to the screening method, but showed lower performance because it maximized the difference between groups. In contrast, the semi-supervised method adjusted for bias using information from the screening method and showed higher performance. In addition, we provided the interpretation of diagnosis and statistical analysis of information using local interpretable model-agnostic explanations and ordinal logistic regression. The proposed data-driven framework demonstrated the feasibility of analyzing depressed patients with items directly or indirectly related to depression.

# Supplementary information

| Domain | Notation | Description                                                                 |
|--------|----------|-----------------------------------------------------------------------------|
| Data   | $N$      | Number of responses                                                         |
|        | $N_L$    | Number of responses with label                                              |
|        | $m$      | Mini-batch size                                                             |
|        | $c_i$    | Common items of $i$ -th questionnaire response                              |
|        | $d_i$    | Different items of $i$ -th questionnaire response                           |
|        | $k_i$    | Questionnaire form of $i$ -th questionnaire response                        |
|        | $x_i$    | $i$ -th questionnaire response ( $c_i, d_i$ ) from questionnaire form $k_i$ |
|        | $y_i$    | Diagnostic result of $i$ -th questionnaire response                         |
|        | $t_i$    | Desired group for $i$ -th questionnaire response                            |
|        | $q$      | Questionnaire form $q$                                                      |
|        | $C$      | Common items of all questionnaire responses                                 |
|        | $D^q$    | Different items of questionnaire responses from questionnaire form $q$      |
|        | $D$      | Different items of all questionnaire responses                              |
|        | $X$      | Questionnaire responses                                                     |
|        | $X_L$    | Questionnaire responses with label                                          |
|        | $Y$      | Diagnostic results                                                          |
|        | $Q$      | Questionnaire forms                                                         |
| Model  | $f_C$    | Encoder network for common items from all questionnaire forms               |
|        | $g_C$    | Decoder network for common items from all questionnaire forms               |
|        | $f_D^q$  | Encoder network for different items from questionnaire form $q$             |
|        | $g_D^q$  | Decoder network for different items from questionnaire form $q$             |
|        | $f_C(C)$ | Latent variables for common items from all questionnaire forms              |
|        | $f_D(D)$ | Latent variables for different items from all questionnaire forms           |
|        | $r$      | Deep canonical correlation network                                          |
|        | $L$      | Output dimension of $r$                                                     |
|        | $U$      | CCA directions for common items                                             |
|        | $V$      | CCA directions for different items                                          |
|        | $M$      | Gaussian mixture for unsupervised clustering                                |
|        | $h$      | Classification network for semi-supervised classification                   |
|        | $\alpha$ | Trade-off parameter for canonical correlation loss                          |
|        | $\beta$  | Trade-off parameter for unsupervised reconstruction loss                    |
|        | $\gamma$ | Trade-off parameter for supervised loss                                     |

**Table S1.** Notation for multi-questionnaire representation learning

---

**Algorithm S1:** Unsupervised pre-training of autoencoder

---

```
1 Procedure PretrainAutoencoder( $R$ )
   Input: Items  $R$ 
   Output: Encoder  $f$ , decoder  $g$ 
2   Initialize  $f$  and  $g$ 
3   for each epoch do
4     for each batch do
5       Sample a mini-batch of  $m$  responses  $\{r_1, \dots, r_m\}$  from  $R$ 
6        $\tilde{r}_i \leftarrow \text{Dropout}(r_i)$ 
7        $h_i \leftarrow f(\tilde{r}_i)$ 
8        $\hat{r}_i \leftarrow g(h_i)$ 
9        $L_R \leftarrow \frac{1}{m} \sum_{i=1}^m (\|r_i - \hat{r}_i\|^2)$ 
10      Calculate gradient of  $L_R$  w.r.t. parameters of  $f$  and  $g$ 
11      Update parameters by taking a gradient step
```

---

---

**Algorithm S2:** Unsupervised clustering of multi-questionnaire representations

---

**Input:** Questionnaire responses  $X$ **Output:** Diagnostic results  $Y$ 

```
/* Pre-train autoencoders */
1  $f_C, g_C \leftarrow \text{PretrainAutoencoder}(C)$ 
2 for each questionnaire form  $q$  do
3    $f_D^q, g_D^q \leftarrow \text{PretrainAutoencoder}(D^q)$ 
/* Fine-tune unsupervised approach */
4 Initialize correlation network  $r$ 
5 for each epoch do
6   for each batch do
7     Sample a mini-batch of  $m$  responses  $\{(c_1, d_1, k_1), \dots, (c_m, d_m, k_m)\}$  from  $X$ 
8      $\tilde{c}_i \leftarrow \text{Dropout}(c_i)$ 
9      $\tilde{d}_i \leftarrow \text{Dropout}(d_i)$ 
10    Calculate unsupervised reconstruction loss  $L_R$ 
11     $L_R \leftarrow \frac{1}{m} \sum_{i=1}^m \left( \|c_i - g_C(f_C(\tilde{c}_i))\|^2 + \|d_i - g_D^{k_i}(f_D^{k_i}(\tilde{d}_i))\|^2 \right)$ 
12    Calculate canonical correlation loss  $L_C$ 
13     $\Sigma_{CC} \leftarrow \text{Cov}(r(f_C(\tilde{C})), r(f_C(\tilde{C})))$ 
14     $\Sigma_{DD} \leftarrow \text{Cov}(r(f_D(\tilde{D})), r(f_D(\tilde{D})))$ 
15     $\Sigma_{CD} \leftarrow \text{Cov}(r(f_C(\tilde{C})), r(f_D(\tilde{D})))$ 
16     $L_C \leftarrow -\frac{1}{L} \text{tr}(U^T \Sigma_{CD} V)$  subject to  $U^T \Sigma_{CC} U = V^T \Sigma_{DD} V = I$ 
17     $T \leftarrow \Sigma_{CC}^{-\frac{1}{2}} \Sigma_{CD} \Sigma_{DD}^{-\frac{1}{2}}$ 
18     $L_C \leftarrow -\frac{1}{L} \sqrt{\text{tr}(T^T T)}$ 
19    Calculate joint loss  $L$  of reconstruction and correlation loss
20     $L \leftarrow \alpha L_C + \beta L_R$ 
21    Calculate gradient of  $L$  w.r.t. parameters of  $f, g$  and  $r$ 
22    Update parameters by taking a gradient step
/* Unsupervised clustering based on multi-questionnaire representations */
23 Extract shared representation  $(r(f_C(c_i)), r(f_D^{k_i}(d_i)))$  for all questionnaire responses  $x_i$ 
24 Initial centroids of Gaussian mixture  $M$  using k-means clustering
25 Estimate centroids and full covariance of  $M$  with EM algorithm
/* Unsupervised diagnostic results */
26 for each response  $x_i$  do
27    $y_i \leftarrow M(r(f_C(c_i)), r(f_D^{k_i}(d_i)))$ 
```

---

---

**Algorithm S3:** Semi-supervised classification of multi-questionnaire representations

---

**Input:** Questionnaire responses  $X$ , Questionnaire responses with label  $X_L$ **Output:** Diagnostic results  $Y$ 

```
/* Pre-train autoencoders */
1  $f_C, g_C \leftarrow \text{PretrainAutoencoder}(C)$ 
2 for each questionnaire form  $q$  do
3    $f_D^q, g_D^q \leftarrow \text{PretrainAutoencoder}(D^q)$ 
/* Fine-tune semi-supervised approach */
4 Initialize correlation network  $r$ 
5 for each epoch do
6   for each batch do
7     Sample a mini-batch of  $m$  responses,  $\{(c_1, d_1, k_1), \dots, (c_m, d_m, k_m)\}$  from  $X$ 
8      $\tilde{c}_i \leftarrow \text{Dropout}(c_i)$ 
9      $\tilde{d}_i \leftarrow \text{Dropout}(d_i)$ 
10    Calculate unsupervised reconstruction loss  $L_R$ 
11     $L_R \leftarrow \frac{1}{m} \sum_{i=1}^m \left( \|c_i - g_C(f_C(\tilde{c}_i))\|^2 + \|d_i - g_D^{k_i}(f_D^{k_i}(\tilde{d}_i))\|^2 \right)$ 
12    Calculate canonical correlation loss  $L_C$ 
13     $\Sigma_{CC} \leftarrow \text{Cov}(r(f_C(\tilde{C})), r(f_C(\tilde{C})))$ 
14     $\Sigma_{DD} \leftarrow \text{Cov}(r(f_D(\tilde{D})), r(f_D(\tilde{D})))$ 
15     $\Sigma_{CD} \leftarrow \text{Cov}(r(f_C(\tilde{C})), r(f_D(\tilde{D})))$ 
16     $L_C \leftarrow -\frac{1}{L} \text{tr}(U^T \Sigma_{CD} V)$  subject to  $U^T \Sigma_{CC} U = V^T \Sigma_{DD} V = I$ 
17     $T \leftarrow \Sigma_{CC}^{-\frac{1}{2}} \Sigma_{CD} \Sigma_{DD}^{-\frac{1}{2}}$ 
18     $L_C \leftarrow -\frac{1}{L} \sqrt{\text{tr}(T^T T)}$ 
19    Calculate supervised loss  $L_S$ 
20    Take all responses  $\{(c_1, d_1, k_1, t_1), \dots, (c_{N_L}, d_{N_L}, k_{N_L}, t_{N_L})\}$  from  $X_L$ 
21     $\tilde{c}_i \leftarrow \text{Dropout}(c_i)$ 
22     $\tilde{d}_i \leftarrow \text{Dropout}(d_i)$ 
23     $L_S \leftarrow -\frac{1}{N_L} \sum_{i=1}^{N_L} \log P(h(r(f_C(\tilde{c}_i)), r(f_D^{k_i}(\tilde{d}_i))) = t_i)$ 
24    Calculate joint loss  $L$  of reconstruction, correlation, and supervised loss
25     $L \leftarrow \alpha L_C + \beta L_R + \gamma L_S$ 
26    Calculate gradient of  $L$  w.r.t. parameters of  $f, g, r$ , and  $h$ 
27    Update parameters by taking a gradient step

/* Semi-supervised diagnostic results */
28 for each response  $x_i$  do
29    $y_i \leftarrow h(r(f_C(c_i)), r(f_D^{k_i}(d_i)))$ 
```

---
